# Supplementary material
Source: publisher site journal article supplement (https://static.cambridge.org/content/id/urn:cambridge.org:id:article:S0016756820000898/resource/name/S0016756820000898supp002.pdf)
Supplement: Supplementary file 1 [file S0016756820000898supp002.pdf]

Table S2 Whole-rock geochemical compositions of investigated samples from the Hengdan Group

| Sample                         | 19BK-36 | 19BK-37 | 19BK-38 | 19BK-39 | 19BK-41 | 19BK-42 |
|--------------------------------|---------|---------|---------|---------|---------|---------|
| Major element (wt.%)           |         |         |         |         |         |         |
| SiO <sub>2</sub>               | 68.01   | 67.97   | 66.80   | 73.19   | 69.28   | 67.57   |
| TiO <sub>2</sub>               | 0.60    | 0.67    | 0.65    | 0.45    | 0.47    | 0.62    |
| Al <sub>2</sub> O <sub>3</sub> | 15.45   | 14.15   | 15.01   | 13.32   | 11.46   | 14.44   |
| FeO <sub>Total</sub>           | 4.18    | 4.45    | 5.02    | 3.75    | 5.86    | 4.75    |
| MnO                            | 0.08    | 0.09    | 0.13    | 0.07    | 0.15    | 0.08    |
| MgO                            | 1.55    | 1.90    | 1.91    | 1.31    | 1.85    | 1.65    |
| CaO                            | 1.17    | 2.29    | 2.46    | 0.75    | 2.82    | 2.24    |
| Na <sub>2</sub> O              | 3.03    | 4.28    | 2.12    | 3.16    | 2.45    | 3.83    |
| K <sub>2</sub> O               | 3.17    | 2.24    | 3.12    | 2.16    | 1.19    | 1.61    |
| P <sub>2</sub> O <sub>5</sub>  | 0.09    | 0.10    | 0.12    | 0.07    | 0.06    | 0.09    |
| LOI                            | 1.96    | 1.36    | 2.11    | 1.74    | 3.87    | 2.36    |
| Total                          | 99.30   | 99.49   | 99.45   | 99.96   | 99.46   | 99.22   |
| Trace element (ppm)            |         |         |         |         |         |         |
| Be                             | 1.78    | 1.41    | 1.78    | 1.49    | 0.805   | 1.05    |
| Sc                             | 12.3    | 12.5    | 12.7    | 8.14    | 8.13    | 11.1    |
| V                              | 69.0    | 83.3    | 72.7    | 45.8    | 48.2    | 69.8    |
| Cr                             | 26.2    | 31.0    | 36.6    | 24.2    | 24.9    | 45.7    |
| Co                             | 7.31    | 11.2    | 10.8    | 5.72    | 11.3    | 12.2    |
| Ni                             | 14.5    | 17.0    | 23.0    | 13.8    | 20.8    | 25.8    |
| Cu                             | 12.1    | 13.7    | 19.9    | 9.44    | 10.8    | 13.1    |
| Zn                             | 67.0    | 61.8    | 69.1    | 45.0    | 81.2    | 63.6    |
| Ga                             | 18.4    | 17.0    | 19.2    | 15.5    | 12.6    | 17.3    |
| Rb                             | 88.3    | 57.2    | 90.7    | 67.9    | 39.1    | 42.1    |
| Sr                             | 147     | 237     | 462     | 149     | 227     | 218     |
| Y                              | 27.5    | 25.4    | 29.6    | 19.7    | 18.9    | 22.0    |
| Zr                             | 217     | 213     | 227     | 169     | 213     | 183     |
| Nb                             | 9.67    | 7.81    | 10.7    | 7.89    | 7.46    | 6.69    |
| Cs                             | 2.96    | 1.22    | 3.69    | 2.49    | 1.45    | 1.62    |
| Ba                             | 692     | 593     | 596     | 470     | 251     | 332     |
| La                             | 26.8    | 24.6    | 31.5    | 20.5    | 20.5    | 21.3    |
| Ce                             | 56.6    | 50.0    | 63.3    | 42.7    | 43.1    | 44.8    |
| Pr                             | 6.72    | 6.32    | 7.18    | 5.12    | 4.95    | 5.38    |
| Nd                             | 25.2    | 24.5    | 27.4    | 18.9    | 18.8    | 21.1    |
| Sm                             | 5.12    | 4.84    | 5.55    | 3.87    | 3.76    | 4.39    |
| Eu                             | 1.21    | 1.18    | 1.31    | 0.877   | 0.863   | 1.20    |
| Gd                             | 5.02    | 4.14    | 4.82    | 3.19    | 3.48    | 3.63    |
| Tb                             | 0.785   | 0.687   | 0.757   | 0.545   | 0.568   | 0.642   |
| Dy                             | 4.81    | 4.09    | 4.95    | 3.56    | 3.37    | 3.89    |
| Ho                             | 0.953   | 0.820   | 1.05    | 0.677   | 0.629   | 0.744   |
| Er                             | 2.80    | 2.43    | 3.01    | 2.06    | 1.91    | 2.26    |
| Tm                             | 0.453   | 0.396   | 0.464   | 0.330   | 0.304   | 0.364   |
| Yb                             | 2.87    | 2.55    | 2.95    | 2.14    | 2.05    | 2.24    |
| Lu                             | 0.456   | 0.380   | 0.448   | 0.332   | 0.330   | 0.357   |
| Hf                             | 5.67    | 5.64    | 5.99    | 4.44    | 5.43    | 4.60    |
| Ta                             | 0.674   | 0.526   | 0.772   | 0.528   | 0.541   | 0.426   |
| Pb                             | 8.33    | 11.4    | 12.8    | 9.38    | 5.56    | 13.5    |
| Th                             | 7.33    | 7.34    | 8.49    | 5.98    | 6.02    | 4.65    |
| U                              | 1.54    | 1.57    | 1.57    | 1.18    | 1.19    | 1.07    |
